# Supplementary material for: Polysubstance Use Among Patients Treated With Buprenorphine From a National Urine Drug Test Database
Source: PubMed Central journal article supplement (PMC8433604; doi:10.1001/jamanetworkopen.2021.23019), 2021-09-10

## Supplemental Online Content

Saloner B, Whitley P, LaRue L, Dawson E, Huskey A. Polysubstance use among patients treated with buprenorphine from a national urine drug test database. *JAMA Netw Open*. 2021;4(9):e2123019. doi:10.1001/jamanetworkopen.2021.23019

**eTable 1.** Characteristics of UDT Specimens Tested for Prescribed Buprenorphine Stratified by Collection Year

**eTable 2.** Crude Positivity Rates Stratified by Buprenorphine Detection and Collection Year for Nonprescribed and/or Illicit Drugs

**eTable 3.** Comparison of Characteristics for UDT Specimens From the First and Second Specimen Sample Populations Collected Between January 1, 2013, and December 31, 2019

**eTable 4.** Comparison of Logistic Regression Results for UDT Specimens From the First and Second Specimen Sample Populations

**eFigure.** Positivity Rates for All Substances Stratified by Year and Patient Positivity for Buprenorphine

This supplemental material has been provided by the authors to give readers additional information about their work.

**eTable 1. Characteristics of UDT Specimens Tested for Prescribed Buprenorphine Stratified by Collection Year**

| Characteristics                       | Specimens Tested, No. (%) |                  |                  |                  |                  |                  |                  |                   |
|---------------------------------------|---------------------------|------------------|------------------|------------------|------------------|------------------|------------------|-------------------|
|                                       | 2013                      | 2014             | 2015             | 2016             | 2017             | 2018             | 2019             | Total             |
| <b>Unique Patient Specimens</b>       | 36,523 (100.00%)          | 24,792 (100.00%) | 25,914 (100.00%) | 17,379 (100.00%) | 12,828 (100.00%) | 16,583 (100.00%) | 15,981 (100.00%) | 150,000 (100.00%) |
| <b>Sex</b>                            |                           |                  |                  |                  |                  |                  |                  |                   |
| F                                     | 15,755 (43.14%)           | 10,926 (44.07%)  | 11,568 (44.64%)  | 7,882 (45.35%)   | 6,091 (47.48%)   | 8,019 (48.36%)   | 7,652 (47.88%)   | 67,893 (45.26%)   |
| M                                     | 20,768 (56.86%)           | 13,866 (55.93%)  | 14,346 (55.36%)  | 9,497 (54.65%)   | 6,737 (52.52%)   | 8,564 (51.64%)   | 8,329 (52.12%)   | 82,107 (54.74%)   |
| <b>Age, y</b>                         |                           |                  |                  |                  |                  |                  |                  |                   |
| 18-24                                 | 4,820 (13.20%)            | 3,092 (12.47%)   | 2,821 (10.89%)   | 1,490 (8.57%)    | 978 (7.62%)      | 1,030 (6.21%)    | 920 (5.76%)      | 15,151 (10.10%)   |
| 25-34                                 | 15,198 (41.61%)           | 10,617 (42.82%)  | 10,913 (42.11%)  | 7,250 (41.72%)   | 5,038 (39.27%)   | 6,687 (40.32%)   | 6,446 (40.34%)   | 62,149 (41.43%)   |
| 35-44                                 | 8,867 (24.28%)            | 6,154 (24.82%)   | 6,741 (26.01%)   | 4,909 (28.25%)   | 3,822 (29.79%)   | 5,101 (30.76%)   | 5,087 (31.83%)   | 40,681 (27.12%)   |
| 45-54                                 | 5,038 (13.79%)            | 3,185 (12.85%)   | 3,499 (13.50%)   | 2,329 (13.40%)   | 1,805 (14.07%)   | 2,264 (13.65%)   | 2,066 (12.93%)   | 20,186 (13.46%)   |
| 55+                                   | 2,519 (6.90%)             | 1,687 (6.80%)    | 1,901 (7.34%)    | 1,380 (7.94%)    | 1,177 (9.18%)    | 1,482 (8.94%)    | 1,447 (9.05%)    | 11,593 (7.73%)    |
| <b>US Census Division</b>             |                           |                  |                  |                  |                  |                  |                  |                   |
| East North Central                    | 8,207 (22.47%)            | 6,504 (26.23%)   | 6,728 (25.96%)   | 5,570 (32.05%)   | 3,364 (26.22%)   | 4,785 (28.85%)   | 4,875 (30.50%)   | 40,033 (26.69%)   |
| East South Central                    | 2,168 (5.94%)             | 1,696 (6.84%)    | 2,387 (9.21%)    | 1,670 (9.61%)    | 1,402 (10.93%)   | 1,739 (10.49%)   | 1,421 (8.89%)    | 12,483 (8.32%)    |
| Mid Atlantic                          | 9,283 (25.42%)            | 5,446 (21.97%)   | 5,337 (20.60%)   | 2,459 (14.15%)   | 949 (7.40%)      | 1,249 (7.53%)    | 771 (4.82%)      | 25,494 (17.00%)   |
| Mountain                              | 1,700 (4.65%)             | 1,503 (6.06%)    | 1,264 (4.88%)    | 966 (5.56%)      | 1,255 (9.78%)    | 1,327 (8.00%)    | 1,512 (9.46%)    | 9,527 (6.35%)     |
| New England                           | 1,936 (5.30%)             | 931 (3.76%)      | 2,327 (8.98%)    | 1,598 (9.20%)    | 1,165 (9.08%)    | 961 (5.80%)      | 748 (4.68%)      | 9,666 (6.44%)     |
| Pacific                               | 1,342 (3.67%)             | 1,358 (5.48%)    | 1,465 (5.65%)    | 1,295 (7.45%)    | 1,255 (9.78%)    | 2,918 (17.60%)   | 3,751 (23.47%)   | 13,384 (8.92%)    |
| South Atlantic                        | 9,109 (24.94%)            | 5,874 (23.69%)   | 5,338 (20.60%)   | 2,860 (16.46%)   | 2,552 (19.89%)   | 2,721 (16.41%)   | 1,944 (12.16%)   | 30,398 (20.27%)   |
| West North Central                    | 460 (1.26%)               | 193 (0.78%)      | 312 (1.20%)      | 275 (1.58%)      | 399 (3.11%)      | 675 (4.07%)      | 801 (5.01%)      | 3,115 (2.08%)     |
| West South Central                    | 2,318 (6.35%)             | 1,287 (5.19%)    | 756 (2.92%)      | 686 (3.95%)      | 487 (3.80%)      | 208 (1.25%)      | 158 (0.99%)      | 5,900 (3.93%)     |
| <b>Health Care Practice Specialty</b> |                           |                  |                  |                  |                  |                  |                  |                   |
| Behavioral Health                     | 3,702 (10.14%)            | 2,750 (11.09%)   | 4,447 (17.16%)   | 3,305 (19.02%)   | 2,463 (19.20%)   | 2,918 (17.60%)   | 2,990 (18.71%)   | 22,575 (15.05%)   |
| Primary Care Physician                | 12,279 (33.62%)           | 7,413 (29.90%)   | 7,069 (27.28%)   | 5,321 (30.62%)   | 4,498 (35.06%)   | 4,685 (28.25%)   | 3,864 (24.18%)   | 45,129 (30.09%)   |
| Substance Use Treatment               | 20,542 (56.24%)           | 14,629 (59.01%)  | 14,398 (55.56%)  | 8,753 (50.37%)   | 5,867 (45.74%)   | 8,980 (54.15%)   | 9,127 (57.11%)   | 82,296 (54.86%)   |
| <b>Payor Group</b>                    |                           |                  |                  |                  |                  |                  |                  |                   |
| Medicaid                              | 0 (0.00%)                 | 0 (0.00%)        | 10,729 (41.40%)  | 8,150 (46.90%)   | 6,144 (47.90%)   | 9,083 (54.77%)   | 10,114 (63.29%)  | 44,220 (29.48%)   |
| Medicare                              | 0 (0.00%)                 | 0 (0.00%)        | 2,053 (7.92%)    | 1,397 (8.04%)    | 1,181 (9.21%)    | 1,422 (8.58%)    | 1,226 (7.67%)    | 7,279 (4.85%)     |

|                                                      |                  |                  |                 |                 |                 |                 |                 |                  |
|------------------------------------------------------|------------------|------------------|-----------------|-----------------|-----------------|-----------------|-----------------|------------------|
| Private insurance                                    | 0 (0.00%)        | 0 (0.00%)        | 8,865 (34.21%)  | 5,112 (29.41%)  | 3,451 (26.90%)  | 3,316 (20.00%)  | 2,981 (18.65%)  | 23,725 (15.82%)  |
| Uninsured                                            | 0 (0.00%)        | 0 (0.00%)        | 4,201 (16.21%)  | 2,591 (14.91%)  | 1,748 (13.63%)  | 2,295 (13.84%)  | 1,560 (9.76%)   | 12,395 (8.26%)   |
| Unknown                                              | 36,523 (100.00%) | 24,792 (100.00%) | 66 (0.25%)      | 129 (0.74%)     | 304 (2.37%)     | 467 (2.82%)     | 100 (0.63%)     | 62,381 (41.59%)  |
| <b>UDT Positives, No. (% positivity)<sup>a</sup></b> |                  |                  |                 |                 |                 |                 |                 |                  |
| Buprenorphine                                        | 32,076 (87.82%)  | 21,420 (86.40%)  | 21,853 (84.33%) | 14,524 (83.57%) | 10,852 (84.60%) | 14,124 (85.17%) | 13,391 (83.79%) | 128,240 (85.49%) |
| Benzodiazepines                                      | 5,805 (19.80%)   | 4,329 (21.25%)   | 4,384 (20.24%)  | 2,699 (20.72%)  | 1,631 (17.69%)  | 1,898 (14.58%)  | 1,738 (13.87%)  | 22,484 (18.87%)  |
| Cocaine                                              | 2,005 (6.08%)    | 1,872 (8.19%)    | 2,416 (9.91%)   | 1,657 (10.78%)  | 1,300 (11.52%)  | 1,431 (9.43%)   | 1,356 (9.95%)   | 12,037 (8.87%)   |
| Alcohol                                              | 2,818 (15.05%)   | 1,924 (14.40%)   | 2,102 (15.08%)  | 1,330 (15.56%)  | 1,134 (15.16%)  | 1,446 (14.09%)  | 1,461 (13.30%)  | 12,215 (14.67%)  |
| Fentanyl                                             | 131 (0.61%)      | 242 (1.66%)      | 685 (3.91%)     | 911 (6.63%)     | 728 (7.03%)     | 1,056 (7.38%)   | 1,464 (10.77%)  | 5,217 (4.94%)    |
| Gabapentin <sup>b</sup>                              | 0 (NA)           | 143 (8.79%)      | 526 (13.36%)    | 397 (14.40%)    | 497 (13.47%)    | 1,093 (15.46%)  | 1,117 (16.77%)  | 3,773 (14.66%)   |
| Heroin                                               | 986 (3.47%)      | 1,025 (5.01%)    | 1,428 (6.53%)   | 976 (6.43%)     | 559 (4.99%)     | 859 (5.73%)     | 952 (6.85%)     | 6,785 (5.38%)    |
| Hydrocodone                                          | 1,652 (4.89%)    | 1,105 (4.78%)    | 998 (4.06%)     | 694 (4.63%)     | 459 (4.18%)     | 458 (3.11%)     | 333 (2.39%)     | 5,699 (4.19%)    |
| Methadone                                            | 743 (2.30%)      | 482 (2.31%)      | 459 (2.03%)     | 323 (2.20%)     | 209 (1.94%)     | 242 (1.69%)     | 209 (1.58%)     | 2,667 (2.07%)    |
| Methamphetamine                                      | 504 (1.53%)      | 553 (2.47%)      | 933 (4.14%)     | 926 (7.57%)     | 1,054 (10.71%)  | 2,107 (15.07%)  | 2,663 (19.45%)  | 8,740 (6.85%)    |
| Marijuana                                            | 1,149 (23.89%)   | 4,277 (23.17%)   | 4,876 (24.91%)  | 3,458 (27.35%)  | 2,839 (27.48%)  | 3,976 (30.57%)  | 3,989 (32.13%)  | 24,564 (26.92%)  |
| Oxycodone                                            | 2,189 (6.54%)    | 1,582 (6.92%)    | 1,715 (7.08%)   | 1,156 (7.54%)   | 706 (6.24%)     | 646 (4.27%)     | 592 (4.28%)     | 8,586 (6.30%)    |
| Tramadol                                             | 98 (3.00%)       | 334 (2.68%)      | 384 (2.54%)     | 319 (2.59%)     | 285 (3.01%)     | 307 (2.41%)     | 226 (1.89%)     | 1,953 (2.53%)    |

Abbreviations: Urine Drug Testing (UDT)

Notes:

150,000 randomly selected patient specimens collected between 2013 and 2019 and tested for prescribed buprenorphine were evaluated.

<sup>a</sup> All positive numbers and positivity rates are based on the non-prescribed analyte population except buprenorphine

<sup>b</sup> No gabapentin UDT results occurred prior to June 2014.

**eTable 2. Crude Positivity Rates (%; 95% CI) Stratified by Buprenorphine Detection and Collection Year for Nonprescribed and/or Illicit Drugs**

| Analyte         | Buprenorphine Detection | 2013                | 2014                | 2015                | 2016                | 2017                | 2018                | 2019                |
|-----------------|-------------------------|---------------------|---------------------|---------------------|---------------------|---------------------|---------------------|---------------------|
| Alcohol         | negative                | 16.61 [15.19-18.11] | 16.29 [14.63-18.05] | 18.27 [16.68-19.95] | 17.28 [15.41-19.27] | 17.29 [15.17-19.56] | 16.53 [14.72-18.47] | 15.27 [13.62-17.04] |
| Alcohol         | positive                | 14.80 [14.26-15.36] | 14.10 [13.47-14.75] | 14.48 [13.85-15.13] | 15.19 [14.36-16.05] | 14.76 [13.89-15.66] | 13.65 [12.94-14.39] | 12.93 [12.25-13.63] |
| Alcohol         | total                   | 15.05 [14.54-15.57] | 14.40 [13.81-15.01] | 15.08 [14.49-15.68] | 15.56 [14.80-16.35] | 15.16 [14.35-15.99] | 14.09 [13.42-14.78] | 13.30 [12.67-13.95] |
| Benzodiazepines | negative                | 25.78 [24.39-27.20] | 27.59 [25.96-29.27] | 27.59 [26.07-29.14] | 25.59 [23.79-27.45] | 22.83 [20.70-25.06] | 18.21 [16.52-19.99] | 15.60 [14.07-17.23] |
| Benzodiazepines | positive                | 18.92 [18.44-19.40] | 20.21 [19.62-20.82] | 18.92 [18.35-19.49] | 19.71 [18.97-20.48] | 16.71 [15.89-17.56] | 13.93 [13.29-14.59] | 13.52 [12.87-14.19] |
| Benzodiazepines | total                   | 19.80 [19.34-20.26] | 21.25 [20.69-21.82] | 20.24 [19.71-20.78] | 20.72 [20.03-21.43] | 17.69 [16.91-18.48] | 14.58 [13.97-15.19] | 13.87 [13.27-14.48] |
| Cocaine         | negative                | 10.93 [9.98-11.94]  | 14.14 [12.95-15.40] | 19.01 [17.79-20.28] | 21.01 [19.49-22.60] | 20.48 [18.65-22.42] | 18.32 [16.76-19.97] | 20.30 [18.68-22.01] |
| Cocaine         | positive                | 5.41 [5.15-5.67]    | 7.23 [6.87-7.60]    | 8.17 [7.80-8.55]    | 8.62 [8.13-9.12]    | 9.80 [9.21-10.41]   | 7.85 [7.39-8.33]    | 7.85 [7.36-8.36]    |
| Cocaine         | total                   | 6.08 [5.82-6.34]    | 8.19 [7.83-8.55]    | 9.91 [9.54-10.29]   | 10.78 [10.29-11.28] | 11.52 [10.93-12.12] | 9.43 [8.97-9.91]    | 9.95 [9.45-10.47]   |
| Fentanyl        | negative                | 2.02 [1.54-2.60]    | 4.89 [4.00-5.90]    | 12.49 [11.28-13.77] | 20.45 [18.86-22.11] | 21.52 [19.56-23.59] | 22.14 [20.40-23.97] | 32.46 [30.54-34.42] |
| Fentanyl        | positive                | 0.39 [0.30-0.49]    | 1.12 [0.94-1.32]    | 2.28 [2.04-2.53]    | 3.66 [3.32-4.02]    | 4.30 [3.88-4.75]    | 4.79 [4.41-5.18]    | 6.38 [5.93-6.84]    |
| Fentanyl        | total                   | 0.61 [0.51-0.73]    | 1.66 [1.45-1.88]    | 3.91 [3.62-4.20]    | 6.63 [6.22-7.06]    | 7.03 [6.54-7.54]    | 7.38 [6.95-7.82]    | 10.77 [10.25-11.30] |
| Gabapentin      | negative                | NA                  | 10.38 [7.25-14.26]  | 14.03 [11.69-16.65] | 11.28 [8.10-15.15]  | 14.45 [11.29-18.11] | 15.54 [13.26-18.05] | 17.55 [15.44-19.82] |
| Gabapentin      | positive                | NA                  | 8.41 [6.96-10.05]   | 13.20 [12.03-14.43] | 14.84 [13.45-16.32] | 13.34 [12.19-14.56] | 15.44 [14.55-16.37] | 16.60 [15.62-17.61] |
| Gabapentin      | total                   | NA                  | 8.79 [7.46-10.28]   | 13.36 [12.32-14.47] | 14.40 [13.11-15.77] | 13.47 [12.39-14.62] | 15.46 [14.62-16.32] | 16.77 [15.88-17.69] |
| Heroin          | negative                | 13.97 [12.86-15.14] | 18.72 [17.28-20.21] | 25.22 [23.79-26.70] | 24.20 [22.58-25.89] | 19.27 [17.48-21.16] | 21.96 [20.28-23.72] | 23.96 [22.25-25.74] |
| Heroin          | positive                | 1.93 [1.76-2.11]    | 2.85 [2.61-3.10]    | 2.99 [2.75-3.25]    | 2.69 [2.42-2.99]    | 2.23 [1.94-2.55]    | 2.83 [2.55-3.13]    | 3.36 [3.04-3.70]    |
| Heroin          | total                   | 3.47 [3.26-3.69]    | 5.01 [4.71-5.32]    | 6.53 [6.21-6.87]    | 6.43 [6.04-6.83]    | 4.99 [4.59-5.40]    | 5.73 [5.36-6.11]    | 6.85 [6.43-7.28]    |
| Hydrocodone     | negative                | 17.85 [16.70-19.04] | 14.65 [13.45-15.92] | 11.65 [10.66-12.70] | 12.49 [11.23-13.84] | 12.18 [10.67-13.83] | 9.66 [8.46-10.97]   | 6.13 [5.19-7.19]    |
| Hydrocodone     | positive                | 3.04 [2.85-3.24]    | 3.18 [2.94-3.44]    | 2.63 [2.41-2.85]    | 3.02 [2.73-3.34]    | 2.72 [2.39-3.07]    | 1.96 [1.72-2.22]    | 1.64 [1.42-1.89]    |
| Hydrocodone     | total                   | 4.89 [4.66-5.12]    | 4.78 [4.51-5.06]    | 4.06 [3.82-4.31]    | 4.63 [4.30-4.98]    | 4.18 [3.81-4.57]    | 3.11 [2.84-3.41]    | 2.39 [2.15-2.66]    |
| Marijuana       | negative                | 27.40 [24.12-30.88] | 28.01 [26.30-29.78] | 30.98 [29.37-32.62] | 33.61 [31.66-35.61] | 32.15 [29.91-34.46] | 36.58 [34.47-38.74] | 37.22 [35.13-39.34] |
| Marijuana       | positive                | 23.29 [22.01-24.61] | 22.37 [21.72-23.02] | 23.74 [23.09-24.40] | 25.99 [25.15-26.84] | 26.59 [25.66-27.53] | 29.48 [28.63-30.34] | 31.12 [30.22-32.02] |
| Marijuana       | total                   | 23.89 [22.69-25.12] | 23.17 [22.56-23.78] | 24.91 [24.30-25.52] | 27.35 [26.57-28.13] | 27.48 [26.62-28.36] | 30.57 [29.78-31.37] | 32.13 [31.31-32.96] |
| Methadone       | negative                | 7.71 [6.91-8.57]    | 6.49 [5.61-7.46]    | 5.59 [4.86-6.39]    | 6.41 [5.49-7.43]    | 5.50 [4.47-6.68]    | 5.25 [4.34-6.29]    | 3.85 [3.08-4.74]    |
| Methadone       | positive                | 1.52 [1.38-1.67]    | 1.66 [1.48-1.85]    | 1.36 [1.20-1.53]    | 1.31 [1.12-1.53]    | 1.26 [1.04-1.51]    | 1.07 [0.90-1.27]    | 1.13 [0.94-1.34]    |
| Methadone       | total                   | 2.30 [2.14-2.47]    | 2.31 [2.11-2.53]    | 2.03 [1.85-2.22]    | 2.20 [1.97-2.45]    | 1.94 [1.69-2.22]    | 1.69 [1.49-1.92]    | 1.58 [1.38-1.81]    |
| Methamphetamine | negative                | 3.03 [2.53-3.60]    | 3.60 [2.96-4.32]    | 7.21 [6.38-8.10]    | 11.71 [10.31-13.22] | 15.78 [13.97-17.71] | 26.98 [25.08-28.94] | 31.62 [29.74-33.56] |
| Methamphetamine | positive                | 1.31 [1.18-1.45]    | 2.30 [2.09-2.52]    | 3.56 [3.30-3.83]    | 6.78 [6.30-7.29]    | 9.79 [9.16-10.44]   | 12.98 [12.38-13.60] | 16.96 [16.28-17.67] |
| Methamphetamine | total                   | 1.53 [1.40-1.66]    | 2.47 [2.27-2.69]    | 4.14 [3.88-4.41]    | 7.57 [7.10-8.05]    | 10.71 [10.10-11.34] | 15.07 [14.48-15.67] | 19.45 [18.79-20.12] |
| Oxycodone       | negative                | 20.20 [18.99-21.46] | 20.31 [18.91-21.76] | 19.05 [17.82-20.33] | 18.54 [17.07-20.08] | 16.72 [15.02-18.53] | 11.67 [10.37-13.07] | 11.91 [10.62-13.29] |
| Oxycodone       | positive                | 4.60 [4.36-4.85]    | 4.79 [4.50-5.10]    | 4.81 [4.52-5.12]    | 5.27 [4.89-5.67]    | 4.27 [3.87-4.70]    | 2.97 [2.69-3.28]    | 2.74 [2.45-3.05]    |
| Oxycodone       | total                   | 6.54 [6.28-6.81]    | 6.92 [6.59-7.25]    | 7.08 [6.76-7.41]    | 7.54 [7.13-7.97]    | 6.24 [5.80-6.70]    | 4.27 [3.95-4.60]    | 4.28 [3.95-4.63]    |
| Tramadol        | negative                | 6.88 [4.62-9.79]    | 5.76 [4.74-6.93]    | 5.31 [4.46-6.27]    | 5.36 [4.45-6.39]    | 8.52 [7.15-10.04]   | 6.78 [5.70-7.99]    | 5.41 [4.47-6.48]    |
| Tramadol        | positive                | 2.44 [1.91-3.08]    | 2.16 [1.89-2.45]    | 2.00 [1.77-2.26]    | 1.99 [1.73-2.28]    | 1.97 [1.68-2.30]    | 1.63 [1.40-1.89]    | 1.16 [0.96-1.39]    |
| Tramadol        | total                   | 3.00 [2.44-3.64]    | 2.68 [2.41-2.98]    | 2.54 [2.30-2.81]    | 2.59 [2.32-2.88]    | 3.01 [2.67-3.37]    | 2.41 [2.15-2.69]    | 1.89 [1.65-2.15]    |

**Note:** Non-prescribed and/or illicit positivity rates (%) for alcohol, benzodiazepines, cocaine, fentanyl, gabapentin, heroin, hydrocodone, marijuana, methadone, methamphetamine, oxycodone, and tramadol stratified by detection of prescribed buprenorphine. Percent positivity rates and 95% CI values are calculated by year. Total positivity was calculated without buprenorphine stratification.

**eTable 3. Comparison of Characteristics for UDT Specimens From the First and Second Specimen Sample Populations Collected Between January 1, 2013, and December 31, 2019**

| <b>Characteristic</b>                                | <b>Specimens Tested, No. (%)</b> |                     |
|------------------------------------------------------|----------------------------------|---------------------|
|                                                      | <b>1st Specimen</b>              | <b>2nd Specimen</b> |
| <b>Unique Patient Specimens</b>                      | 150,000 (100.00%)                | 137,722 (100.00%)   |
| <b>Sex</b>                                           |                                  |                     |
| Female                                               | 67,893 (45.26%)                  | 62,768 (45.58%)     |
| Male                                                 | 82,107 (54.74%)                  | 74,954 (54.42%)     |
| <b>Age, y</b>                                        |                                  |                     |
| 18-24                                                | 15,151 (10.10%)                  | 14,747 (10.71%)     |
| 25-34                                                | 62,149 (41.43%)                  | 57,922 (42.06%)     |
| 35-44                                                | 40,681 (27.12%)                  | 37,088 (26.93%)     |
| 45-54                                                | 20,186 (13.46%)                  | 17,756 (12.89%)     |
| 55+                                                  | 11,593 (7.73%)                   | 9,986 (7.25%)       |
| <b>US Census Division</b>                            |                                  |                     |
| East North Central                                   | 40,033 (26.69%)                  | 39,554 (28.72%)     |
| East South Central                                   | 12,483 (8.32%)                   | 11,164 (8.11%)      |
| Mid Atlantic                                         | 25,494 (17.00%)                  | 21,029 (15.27%)     |
| Mountain                                             | 9,527 (6.35%)                    | 8,274 (6.01%)       |
| New England                                          | 9,666 (6.44%)                    | 9,308 (6.76%)       |
| Pacific                                              | 13,384 (8.92%)                   | 11,864 (8.61%)      |
| South Atlantic                                       | 30,398 (20.27%)                  | 28,766 (20.89%)     |
| West North Central                                   | 3,115 (2.08%)                    | 2,964 (2.15%)       |
| West South Central                                   | 5,900 (3.93%)                    | 4,799 (3.48%)       |
| <b>Health Care Practice Specialty</b>                |                                  |                     |
| Substance Use Treatment                              | 82,296 (54.86%)                  | 80,496 (58.45%)     |
| Behavioral Health                                    | 22,575 (15.05%)                  | 19,042 (13.83%)     |
| Primary Care Physician                               | 45,129 (30.09%)                  | 38,184 (27.73%)     |
| <b>Payor Group</b>                                   |                                  |                     |
| Private insurance                                    | 23,725 (15.82%)                  | 23,430 (17.01%)     |
| Medicaid                                             | 44,220 (29.48%)                  | 45,173 (32.80%)     |
| Medicare                                             | 7,279 (4.85%)                    | 6,974 (5.06%)       |
| Uninsured                                            | 12,395 (8.26%)                   | 10,273 (7.46%)      |
| Unknown                                              | 62,381 (41.59%) <sup>a</sup>     | 51,872 (37.66%)     |
| <b>UDT Positives, No. (% positivity)<sup>a</sup></b> |                                  |                     |
| Buprenorphine                                        | 128,240 (85.49%)                 | 127,469 (92.56%)    |
| Benzodiazepines                                      | 22,484 (18.87%)                  | 18,148 (16.34%)     |
| Cocaine                                              | 12,037 (8.87%)                   | 10,072 (8.08%)      |
| Alcohol                                              | 12,215 (14.67%)                  | 10,873 (13.04%)     |
| Fentanyl                                             | 5,217 (4.94%)                    | 4,194 (4.18%)       |
| Gabapentin <sup>b</sup>                              | 3,773 (14.66%)                   | 3,627 (13.76%)      |
| Heroin                                               | 6,785 (5.38%)                    | 4,438 (3.80%)       |
| Hydrocodone                                          | 5,699 (4.19%)                    | 2,608 (2.06%)       |
| Methadone                                            | 2,667 (2.07%)                    | 1,870 (1.57%)       |
| Methamphetamine                                      | 8,740 (6.85%)                    | 6,644 (5.65%)       |
| Marijuana                                            | 24,564 (26.92%)                  | 23,848 (26.29%)     |
| Oxycodone                                            | 8,586 (6.30%)                    | 4,770 (3.77%)       |
| Tramadol                                             | 1,953 (2.53%)                    | 1,341 (1.74%)       |

Abbreviations: Urine Drug Testing (UDT)

Notes:

150,000 randomly selected patient specimens collected between 2013 and 2019 and tested for prescribed buprenorphine were evaluated.

<sup>a</sup> All positive numbers and positivity rates are based on the non-prescribed analyte population except buprenorphine

<sup>b</sup> No gabapentin UDT results occurred prior to June 2014.

**eTable 4. Comparison of Logistic Regression Results for UDT Specimens From the First and Second Specimen Sample Populations**

|                         | 1st Specimen         |                      |                   | 2nd Specimen         |                      |                   |
|-------------------------|----------------------|----------------------|-------------------|----------------------|----------------------|-------------------|
|                         | Negative Probability | Positive Probability | Adjusted OR       | Negative Probability | Positive Probability | Adjusted OR       |
| Benzodiazepines         | 0.247[0.236-0.258]   | 0.181[0.175-0.187]   | 1.48 [1.41-1.56]  | 0.184[0.171-0.198]   | 0.167[0.162-0.173]   | 1.12 [1.04-1.21]  |
| Cocaine                 | 0.121[0.113-0.129]   | 0.049[0.046-0.053]   | 2.64 [2.50-2.78]  | 0.103[0.094-0.113]   | 0.044[0.041-0.047]   | 2.51 [2.33-2.70]  |
| Alcohol                 | 0.175[0.165-0.187]   | 0.147[0.141-0.153]   | 1.24 [1.16-1.32]  | 0.146[0.133-0.161]   | 0.133[0.127-0.139]   | 1.12 [1.02-1.23]  |
| Fentanyl                | 0.119[0.109-0.129]   | 0.020[0.018-0.022]   | 6.71 [6.29-7.16]  | 0.086[0.072-0.104]   | 0.018[0.015-0.021]   | 5.27 [4.85-5.73]  |
| Gabapentin <sup>a</sup> | 0.128[0.115-0.143]   | 0.123[0.115-0.133]   | 1.05 [0.94-1.15]  | 0.095[0.080-0.112]   | 0.108[0.100-0.117]   | 0.86 [0.74-1.00]  |
| Heroin                  | 0.143[0.133-0.154]   | 0.017[0.015-0.018]   | 9.93 [9.31-10.59] | 0.122[0.109-0.135]   | 0.014[0.013-0.016]   | 9.60 [8.86-10.41] |
| Hydrocodone             | 0.114[0.105-0.123]   | 0.024[0.023-0.026]   | 5.11 [4.73-5.53]  | 0.064[0.055-0.073]   | 0.015[0.013-0.017]   | 4.47 [3.92-5.09]  |
| Methadone               | 0.052[0.046-0.058]   | 0.011[0.010-0.013]   | 4.75 [4.26-5.29]  | 0.034[0.028-0.041]   | 0.010[0.008-0.011]   | 3.53 [3.03-4.09]  |
| Methamphetamine         | 0.137[0.128-0.146]   | 0.069[0.066-0.073]   | 2.14 [2.01-2.27]  | 0.120[0.109-0.131]   | 0.059[0.056-0.063]   | 2.17 [1.99-2.36]  |
| Oxycodone               | 0.142[0.133-0.152]   | 0.036[0.033-0.038]   | 4.50 [4.23-4.79]  | 0.087[0.078-0.098]   | 0.026[0.024-0.028]   | 3.61 [3.27-3.99]  |
| Marijuana               | 0.309[0.298-0.321]   | 0.253[0.246-0.259]   | 1.33 [1.27-1.39]  | 0.263[0.248-0.278]   | 0.249[0.242-0.255]   | 1.08 [1.01-1.15]  |
| Tramadol                | 0.055[0.049-0.062]   | 0.016[0.014-0.017]   | 3.69 [3.32-4.10]  | 0.033[0.027-0.040]   | 0.013[0.012-0.015]   | 2.57 [2.16-3.03]  |

Notes: Adjusted marginal probabilities and adjusted Odds Ratios for the 1<sup>st</sup> and 2<sup>nd</sup> specimen sample populations are shown

<sup>a</sup> Gabapentin aOR was not found to be significant in either the 1<sup>st</sup> or 2<sup>nd</sup> sample populations. All other aOR values were significant for both sample populations at the p<=0.05 level.

eFigure. Positivity Rates for All Substances Stratified by Year and Patient Positivity for Buprenorphine

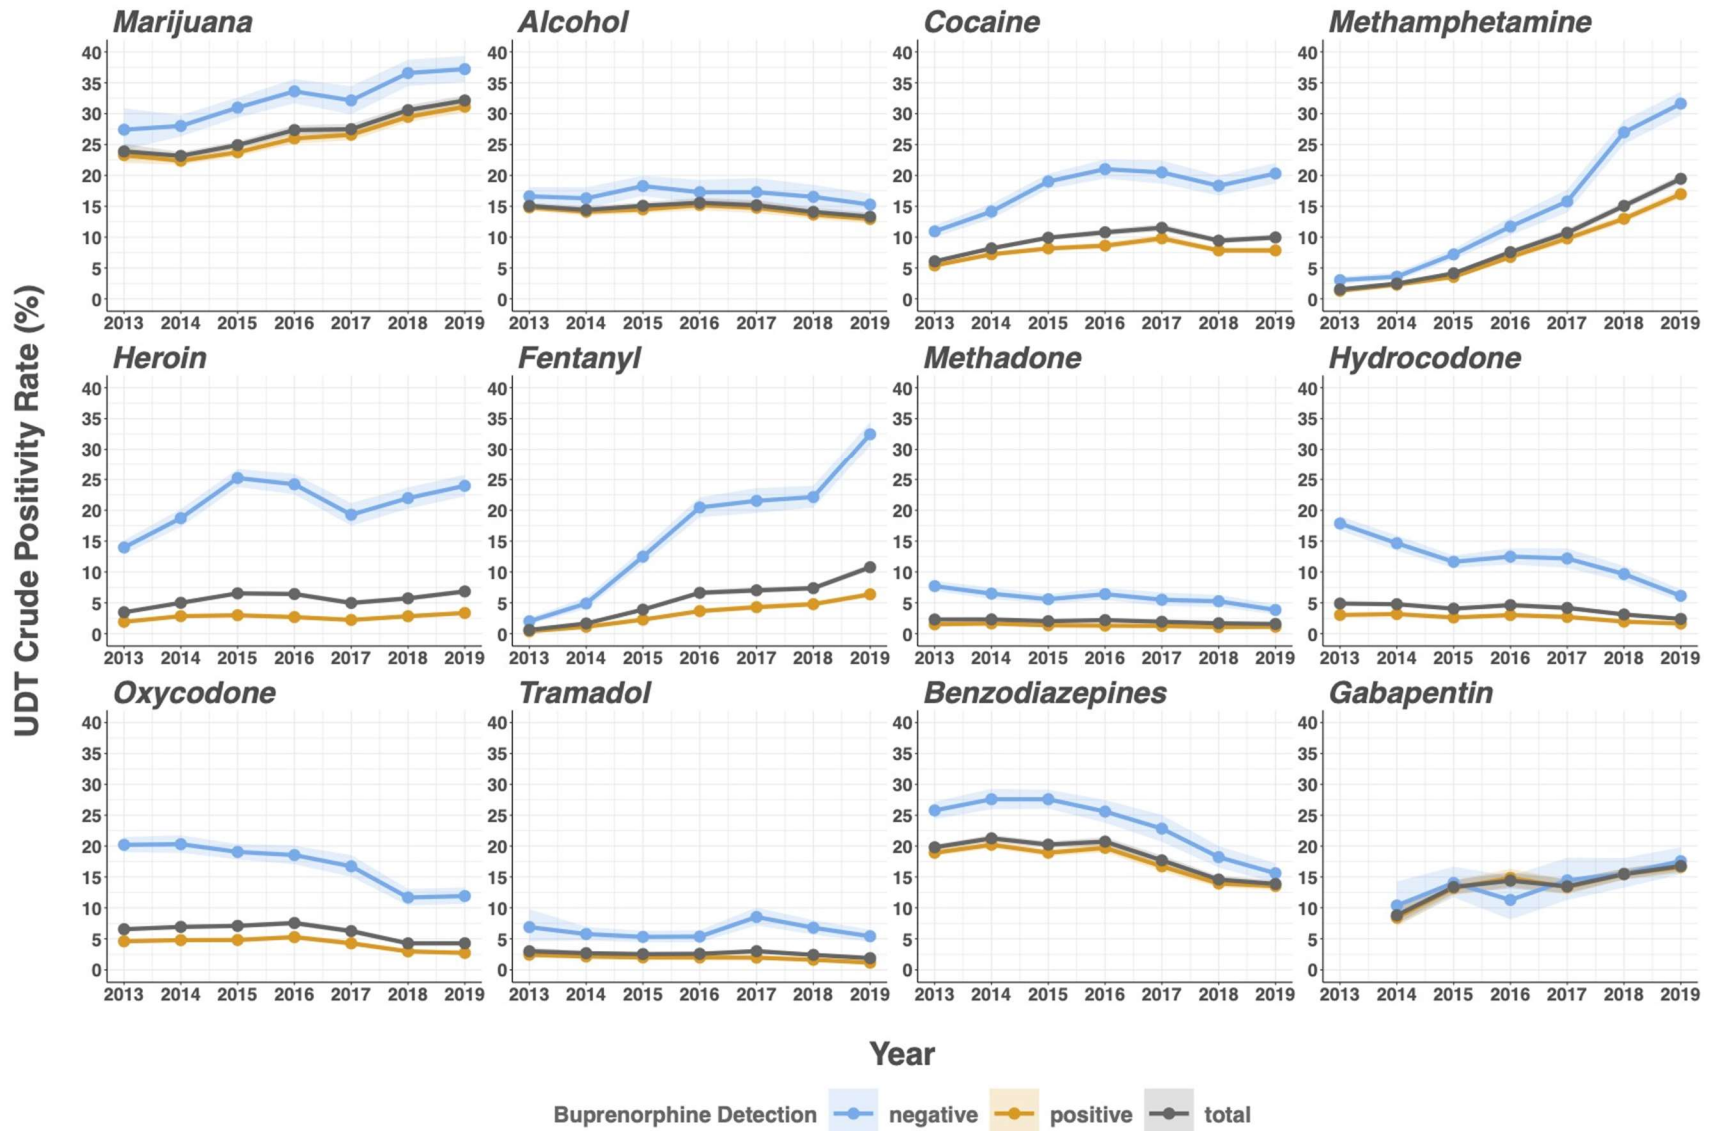

Supplement: jamanetwopen-e2123019-s001.pdf [file jamanetwopen-e2123019-s001.pdf]
